# Supplementary material for: Contents of the Sexual and Reproductive Health Subject in the Undergraduate Nursing Curricula of Spanish Universities: A Cross-Sectional Study
Source: MDPI journal article supplement (doi:10.3390/ijerph182111472), 2021-10-31
Supplement: s1 [file s1]

**Supplementary Table S1.** Subtopics of the area of Reproductive Health. (N = 77)

|                                                                | Total<br>Universities<br>(N = 77) |      | Public<br>Universities<br>(n = 52) |      | Private<br>Universities<br>(n = 25) |      |         |
|----------------------------------------------------------------|-----------------------------------|------|------------------------------------|------|-------------------------------------|------|---------|
|                                                                | n                                 | %    | n                                  | %    | n                                   | %    | p       |
| <b>I. Human reproduction</b>                                   |                                   |      |                                    |      |                                     |      |         |
| 1. Anatomy of the female reproductive organs                   | 60                                | 77,9 | 40                                 | 76,9 | 20                                  | 80,0 |         |
| 2. Physiology of the female reproductive system                | 61                                | 79,2 | 42                                 | 80,8 | 19                                  | 76,0 |         |
| 3. Anatomy and physiology of the male reproductive system 14.2 | 32                                | 41,6 | 24                                 | 46,2 | 8                                   | 32,0 | < 0,05  |
| 4. Gametogenesis 10.5                                          | 33                                | 42,9 | 24                                 | 46,2 | 9                                   | 36,0 | < 0,05  |
| <b>II. Human prenatal development</b>                          |                                   |      |                                    |      |                                     |      |         |
| 1. Fertilization, implantation, germ disc                      | 50                                | 64,9 | 35                                 | 67,3 | 15                                  | 60,0 |         |
| 2. Embryonic period                                            | 43                                | 55,8 | 29                                 | 55,8 | 14                                  | 56,0 |         |
| 3. Fetal period                                                | 42                                | 54,5 | 30                                 | 57,7 | 12                                  | 48,0 |         |
| 4. Development and structure of the placenta 12.5              | 25                                | 32,5 | 19                                 | 36,5 | 6                                   | 24,0 | < 0,05  |
| <b>III. Pregnancy</b>                                          |                                   |      |                                    |      |                                     |      |         |
| 1. Preconception consultation                                  | 34                                | 44,2 | 26                                 | 50,0 | 8                                   | 32,0 | < 0,05  |
| 2. Pregnancy                                                   | 65                                | 84,4 | 45                                 | 86,5 | 20                                  | 80,0 |         |
| 3. Diagnosis of pregnancy                                      | 41                                | 53,2 | 30                                 | 57,7 | 11                                  | 44,0 | < 0,05  |
| 4. Prenatal care                                               | 46                                | 59,7 | 31                                 | 59,6 | 15                                  | 60,0 |         |
| 5. Prenatal diagnosis                                          | 27                                | 35,1 | 22                                 | 42,3 | 5                                   | 20,0 | < 0,01  |
| 6. Assessment of fetal well-being                              | 31                                | 40,3 | 25                                 | 48,1 | 6                                   | 24,0 | < 0,01  |
| 7. Health education for pregnant women                         | 33                                | 42,9 | 28                                 | 53,8 | 5                                   | 20,0 | < 0,001 |
| 8. Nutrition of the pregnant woman                             | 24                                | 31,2 | 21                                 | 40,4 | 3                                   | 12,0 | < 0,01  |
| 9. Factors that affect the development of pregnancy            | 24                                | 31,2 | 20                                 | 38,5 | 4                                   | 16,0 | < 0,01  |
| 10. Drugs in pregnancy                                         | 17                                | 22,1 | 15                                 | 28,8 | 2                                   | 8,0  | < 0,01  |
| 11. Psychosocial aspects in pregnancy                          | 26                                | 33,8 | 23                                 | 44,2 | 3                                   | 12,0 | < 0,001 |
| 12. Maternity education programs                               | 25                                | 32,5 | 22                                 | 42,3 | 3                                   | 12,0 | < 0,001 |
| 13. Assisted reproduction                                      | 20                                | 26,0 | 18                                 | 34,6 | 2                                   | 8,0  | < 0,01  |

|                                                                     | Total Universities<br>(N = 77) |      | Public Universities<br>(n = 52) |      | Private Universities<br>(n = 25) |      |        |
|---------------------------------------------------------------------|--------------------------------|------|---------------------------------|------|----------------------------------|------|--------|
|                                                                     | n                              | %    | n                               | %    | n                                | %    | p      |
| <b>IV. Health problems during pregnancy</b>                         |                                |      |                                 |      |                                  |      |        |
| 1. Bleeding problems                                                | 63                             | 81,8 | 44                              | 84,6 | 19                               | 76,0 |        |
| 2. Hypertensive states                                              | 64                             | 83,1 | 45                              | 86,5 | 19                               | 76,0 | < 0,05 |
| 3. Diabetes                                                         | 56                             | 72,7 | 40                              | 76,9 | 16                               | 64,0 | < 0,05 |
| 4. Anemias                                                          | 44                             | 57,1 | 30                              | 57,7 | 14                               | 56,0 |        |
| 5. Heart problems. Heart disease                                    | 43                             | 55,8 | 30                              | 57,7 | 13                               | 52,0 |        |
| 6. Varicose syndromes                                               | 39                             | 50,6 | 27                              | 51,9 | 12                               | 48,0 |        |
| 7. Endocrine problems                                               | 46                             | 59,7 | 31                              | 59,6 | 15                               | 60,0 |        |
| 8. Renal problems                                                   | 43                             | 55,8 | 29                              | 55,8 | 14                               | 56,0 |        |
| 9. Hyperemesis                                                      | 51                             | 66,2 | 34                              | 65,4 | 17                               | 68,0 |        |
| 10. Oral and digestive problems                                     | 44                             | 57,1 | 29                              | 55,8 | 15                               | 60,0 |        |
| 11. Respiratory problems                                            | 43                             | 55,8 | 29                              | 55,8 | 14                               | 56,0 |        |
| 12. Neurological problems                                           | 42                             | 54,5 | 29                              | 55,8 | 13                               | 52,0 |        |
| 13. Dermatological problems                                         | 40                             | 51,9 | 27                              | 51,9 | 13                               | 52,0 |        |
| 14. Neoplastic problems                                             | 44                             | 57,1 | 31                              | 59,6 | 13                               | 52,0 |        |
| 15. Infectious problems                                             | 60                             | 77,9 | 40                              | 76,9 | 20                               | 80,0 |        |
| 16. AIDS                                                            | 48                             | 62,3 | 33                              | 63,5 | 15                               | 60,0 |        |
| 17. Consumption of toxic substances                                 | 43                             | 55,8 | 29                              | 55,8 | 14                               | 56,0 |        |
| 18. Perinatal hemolytic disease                                     | 42                             | 54,5 | 29                              | 55,8 | 13                               | 52,0 |        |
| 19. Alterations of the placenta, membranes, cord and amniotic fluid | 49                             | 63,6 | 31                              | 59,6 | 18                               | 72,0 | < 0,05 |
| 20. Multiple gestation                                              | 51                             | 66,2 | 37                              | 71,2 | 14                               | 56,0 | < 0,05 |
| 21. Threat of premature labor                                       | 50                             | 64,9 | 35                              | 67,3 | 15                               | 60,0 |        |
| 22. Prolonged pregnancy                                             | 44                             | 57,1 | 30                              | 57,7 | 14                               | 56,0 |        |
| 23. Intrauterine growth retardation                                 | 46                             | 59,7 | 32                              | 61,5 | 14                               | 56,0 |        |
| 24. Psychological aspects of pregnancy at risk                      | 42                             | 54,5 | 28                              | 53,8 | 14                               | 56,0 |        |
| 25. Mental health disorders                                         | 40                             | 51,9 | 27                              | 51,9 | 13                               | 52,0 |        |
| 26. Antepartum fetal death                                          | 41                             | 53,2 | 29                              | 55,8 | 12                               | 48,0 |        |

|                                                                    | Total Universities<br>(N = 77) |      | Public Universities<br>(n = 52) |      | Private Universities<br>(n = 25) |      |        |
|--------------------------------------------------------------------|--------------------------------|------|---------------------------------|------|----------------------------------|------|--------|
|                                                                    | n                              | %    | n                               | %    | n                                | %    | p      |
| 27. Drugs in health problems                                       | 39                             | 50,6 | 27                              | 51,9 | 12                               | 48,0 |        |
| 28. Genetic counseling and prenatal diagnosis. Reproductive advice | 42                             | 54,5 | 29                              | 55,8 | 13                               | 52,0 |        |
| <b>V. Delivery</b>                                                 |                                |      |                                 |      |                                  |      |        |
| 1. Labor and delivery                                              | 61                             | 79,2 | 39                              | 75,0 | 22                               | 88,0 | < 0,05 |
| 2. Factors involved in childbirth                                  | 36                             | 46,8 | 22                              | 42,3 | 14                               | 56,0 | < 0,05 |
| 3. Start of labor and delivery periods                             | 50                             | 64,9 | 32                              | 61,5 | 18                               | 72,0 | < 0,05 |
| 4. Mechanism of delivery in vertex presentation                    | 29                             | 37,7 | 20                              | 38,5 | 9                                | 36,0 |        |
| 5. Assistance and care of the woman in childbirth                  | 48                             | 62,3 | 31                              | 59,6 | 17                               | 68,0 |        |
| 6. Assessment of fetal well-being                                  | 31                             | 40,3 | 22                              | 42,3 | 9                                | 36,0 |        |
| 7. Pain relief in labor                                            | 37                             | 48,1 | 23                              | 44,2 | 14                               | 56,0 | < 0,05 |
| 8. Attention to normal delivery                                    | 51                             | 66,2 | 35                              | 67,3 | 16                               | 64,0 |        |
| 9. Drugs in childbirth                                             | 22                             | 28,6 | 15                              | 28,8 | 7                                | 28,0 |        |
| 10. Obstetric analgesia and anesthesia                             | 24                             | 31,2 | 16                              | 30,8 | 8                                | 32,0 |        |
| 11. Assistance and care of the woman in directed childbirth        | 30                             | 39,0 | 21                              | 40,4 | 9                                | 36,0 |        |
| 12. Psychological aspects of women during labor                    | 25                             | 32,5 | 17                              | 32,7 | 8                                | 32,0 |        |
| 13. Different alternatives in obstetric care                       | 24                             | 31,2 | 16                              | 30,8 | 8                                | 32,0 |        |
| <b>VI. Complications in labor and delivery</b>                     |                                |      |                                 |      |                                  |      |        |
| 1. Dystocic delivery                                               | 54                             | 70,1 | 33                              | 63,5 | 21                               | 84,0 | < 0,01 |
| 2. Alterations in fetal statics                                    | 35                             | 45,5 | 24                              | 46,2 | 11                               | 44,0 |        |
| 3. Obstetric instrumentation and interventions                     | 39                             | 50,6 | 27                              | 51,9 | 12                               | 48,0 |        |
| 4. Birth trauma                                                    | 34                             | 44,2 | 24                              | 46,2 | 10                               | 40,0 |        |
| 5. Premature rupture of membranes                                  | 42                             | 54,5 | 29                              | 55,8 | 13                               | 52,0 |        |
| 6. Intrapartum fever                                               | 31                             | 40,3 | 22                              | 42,3 | 9                                | 36,0 |        |
| 7. Risk of loss of fetal well-being                                | 33                             | 42,9 | 24                              | 46,2 | 9                                | 36,0 | < 0,05 |
| 8. Preterm delivery                                                | 35                             | 45,5 | 25                              | 48,1 | 10                               | 40,0 |        |
| 9. Birth abnormalities                                             | 35                             | 45,5 | 24                              | 46,2 | 11                               | 44,0 |        |

|                                                         | Total Universities<br>(N = 77) |      | Public Universities<br>(n = 52) |      | Private Universities<br>(n = 25) |      |         |
|---------------------------------------------------------|--------------------------------|------|---------------------------------|------|----------------------------------|------|---------|
|                                                         | n                              | %    | n                               | %    | n                                | %    | p       |
| 10. Childbirth and puerperium hemorrhages               | 34                             | 44,2 | 22                              | 42,3 | 12                               | 48,0 |         |
| 11. Drugs in Complicated Labor                          | 31                             | 40,3 | 21                              | 40,4 | 10                               | 40,0 |         |
| 12. Special obstetric emergency situations              | 39                             | 50,6 | 28                              | 53,8 | 11                               | 44,0 |         |
| <b>VII. Puerperium and lactation</b>                    |                                |      |                                 |      |                                  |      |         |
| 1. The puerperium                                       | 65                             | 84,4 | 45                              | 86,5 | 20                               | 80,0 |         |
| 2. Drugs in the puerperium and lactation                | 14                             | 18,2 | 12                              | 23,1 | 2                                | 8,0  | < 0,05  |
| 3. Psychosocial adaptation of the puerperal woman       | 21                             | 27,3 | 19                              | 36,5 | 2                                | 8,0  | < 0,01  |
| 4. Lactation                                            | 22                             | 28,6 | 18                              | 34,6 | 4                                | 16,0 | < 0,05  |
| 5. Breastfeeding                                        | 55                             | 71,4 | 36                              | 69,2 | 19                               | 76,0 |         |
| 6. Home care in the puerperium                          | 21                             | 27,3 | 18                              | 34,6 | 3                                | 12,0 | < 0,01  |
| 7. Postpartum programs                                  | 16                             | 20,8 | 14                              | 26,9 | 2                                | 8,0  | < 0,05  |
| <b>VIII. Health problems in the puerperium</b>          |                                |      |                                 |      |                                  |      |         |
| 1. Puerperal fever                                      | 41                             | 53,2 | 29                              | 55,8 | 12                               | 48,0 |         |
| 2. Thromboembolic disease                               | 49                             | 63,6 | 35                              | 67,3 | 14                               | 56,0 | < 0,05  |
| 3. Pelvic joint injuries. Scar dehiscences              | 41                             | 53,2 | 29                              | 55,8 | 12                               | 48,0 |         |
| 4. Psychological disorders in the puerperium            | 44                             | 57,1 | 32                              | 61,5 | 12                               | 48,0 | < 0,05  |
| 5. The grieving process in motherhood and reproduction  | 42                             | 54,5 | 30                              | 57,7 | 12                               | 48,0 |         |
| 6. Drugs in the puerperium with complications           | 41                             | 53,2 | 30                              | 57,7 | 11                               | 44,0 | < 0,05  |
| <b>IX. Women's reproductive health care</b>             |                                |      |                                 |      |                                  |      |         |
| 1. Women's Sexual and Reproductive Health Care Programs | 20                             | 26,0 | 15                              | 28,8 | 5                                | 20,0 |         |
| 2. Attention to women's sexual and reproductive health  | 37                             | 48,1 | 24                              | 46,2 | 13                               | 52,0 |         |
| 3. Family planning and contraceptive counseling         | 38                             | 49,4 | 32                              | 61,5 | 6                                | 24,0 | < 0,001 |
| 4. Natural methods                                      | 28                             | 36,4 | 22                              | 42,3 | 6                                | 24,0 | < 0,05  |
| 5. Barrier methods                                      | 28                             | 36,4 | 22                              | 42,3 | 6                                | 24,0 | < 0,05  |
| 6. Hormonal contraception                               | 21                             | 27,3 | 19                              | 36,5 | 2                                | 8,0  | < 0,01  |

|                                                               | Total Universities<br>(N = 77) |      | Public Universities<br>(n = 52) |      | Private Universities<br>(n = 25) |      |        |
|---------------------------------------------------------------|--------------------------------|------|---------------------------------|------|----------------------------------|------|--------|
|                                                               | n                              | %    | n                               | %    | n                                | %    | p      |
| 7. Intrauterine device                                        | 19                             | 24,7 | 16                              | 30,8 | 3                                | 12,0 | < 0,05 |
| 8. Surgical methods                                           | 16                             | 20,8 | 12                              | 23,1 | 4                                | 16,0 |        |
| 9. Contraception in special situations                        | 12                             | 15,6 | 11                              | 21,2 | 1                                | 4,0  | < 0,05 |
| 10. Voluntary termination of pregnancy                        | 12                             | 15,6 | 11                              | 21,2 | 1                                | 4,0  | < 0,05 |
| 11. Puberty and adolescence                                   | 29                             | 37,7 | 18                              | 34,6 | 11                               | 44,0 |        |
| 12. Climacteric and menopause                                 | 58                             | 75,3 | 38                              | 73,1 | 20                               | 80,0 |        |
| 13. Drugs in sexual and reproductive health care              | 8                              | 10,4 | 8                               | 15,4 | 0                                | 0,0  | < 0,05 |
| <b>X. Care for women with reproductive health problems</b>    |                                |      |                                 |      |                                  |      |        |
| 1. Alterations of the menstrual cycle                         | 45                             | 58,4 | 31                              | 59,6 | 14                               | 56,0 |        |
| 2. Sexually transmitted infections                            | 51                             | 66,2 | 34                              | 65,4 | 17                               | 68,0 |        |
| 3. Infectious processes of the reproductive system            | 37                             | 48,1 | 24                              | 46,2 | 13                               | 52,0 |        |
| 4. Pelvic pain                                                | 17                             | 22,1 | 12                              | 23,1 | 5                                | 20,0 |        |
| 5. Infertility and sterility                                  | 38                             | 49,4 | 25                              | 48,1 | 13                               | 52,0 |        |
| 6. Malformations of the genital tract                         | 18                             | 23,4 | 12                              | 23,1 | 6                                | 24,0 |        |
| 7. Benign alterations of the female genital tract             | 32                             | 41,6 | 23                              | 44,2 | 9                                | 36,0 |        |
| 8. Changes in genital statics                                 | 15                             | 19,5 | 9                               | 17,3 | 6                                | 24,0 |        |
| 9. Urinary incontinence                                       | 15                             | 19,5 | 12                              | 23,1 | 3                                | 12,0 | < 0,05 |
| 10. Benign breast disorders                                   | 33                             | 42,9 | 19                              | 36,5 | 14                               | 56,0 | < 0,05 |
| 11. Early diagnosis of breast and gynecological cancer        | 36                             | 46,8 | 24                              | 46,2 | 12                               | 48,0 |        |
| 12. Gynecological and breast cancer                           | 47                             | 61,0 | 30                              | 57,7 | 17                               | 68,0 | < 0,05 |
| 13. Drugs in sexual and reproductive health problems          | 8                              | 10,4 | 7                               | 13,5 | 1                                | 4,0  |        |
| 14. Gynecological Surgical Interventions                      | 12                             | 15,6 | 8                               | 15,4 | 4                                | 16,0 |        |
| 15. The hospitalized gynecological patient                    | 12                             | 15,6 | 8                               | 15,4 | 4                                | 16,0 |        |
| <b>XI. Epidemiology and demography in reproductive health</b> |                                |      |                                 |      |                                  |      |        |
| 1. Epidemiology                                               | 7                              | 9,1  | 5                               | 9,6  | 2                                | 8,0  |        |
| 2. Diagnostic tests in reproductive health processes          | 9                              | 11,7 | 6                               | 11,5 | 3                                | 12,0 |        |

|                                                                             | Total Universities<br>(N = 77) |      | Public Universities<br>(n = 52) |      | Private Universities<br>(n = 25) |      |        |
|-----------------------------------------------------------------------------|--------------------------------|------|---------------------------------|------|----------------------------------|------|--------|
|                                                                             | n                              | %    | n                               | %    | n                                | %    | p      |
| 3. Maternal and reproductive health demographics                            | 3                              | 3,9  | 2                               | 3,8  | 1                                | 4,0  |        |
| 4. Reproductive morbidity                                                   | 2                              | 2,6  | 1                               | 1,9  | 1                                | 4,0  |        |
| <b>XII. Socio-anthropological aspects in reproductive health</b>            |                                |      |                                 |      |                                  |      |        |
| 1. Sociocultural influences on reproductive health care                     | 4                              | 5,2  | 2                               | 3,8  | 2                                | 8,0  |        |
| 2. Gender perspective                                                       | 10                             | 13,0 | 8                               | 15,4 | 2                                | 8,0  |        |
| 3. The family and family forms                                              | 6                              | 7,8  | 4                               | 7,7  | 2                                | 8,0  |        |
| 4. Anthropology of motherhood                                               | 3                              | 3,9  | 2                               | 3,8  | 1                                | 4,0  |        |
| 5. Women and immigration                                                    | 1                              | 1,3  | 0                               | 0,0  | 1                                | 4,0  |        |
| <b>XIII. Women's Health Education and Research</b>                          |                                |      |                                 |      |                                  |      |        |
| 1. Education for women's health                                             | 30                             | 39,0 | 22                              | 42,3 | 8                                | 32,0 | < 0,05 |
| 2. Individual health education and group health education                   | 6                              | 7,8  | 3                               | 5,8  | 3                                | 12,0 |        |
| 3. Learning in adults                                                       | 5                              | 6,5  | 3                               | 5,8  | 2                                | 8,0  |        |
| 4. Health attitudes and behaviors                                           | 10                             | 13,0 | 7                               | 13,5 | 3                                | 12,0 |        |
| 5. The communicative process in education for women's health                | 8                              | 10,4 | 4                               | 7,7  | 4                                | 16,0 |        |
| 6. Teaching strategies                                                      | 11                             | 14,3 | 6                               | 11,5 | 5                                | 20,0 |        |
| 7. Application of group dynamics in educational programs for women's health | 1                              | 1,3  | 1                               | 1,9  | 2                                | 8,0  |        |
| 8. Gender perspective in health education programs                          | 12                             | 15,6 | 7                               | 13,5 | 5                                | 20,0 |        |
| 9. Development of a health education program for women                      | 2                              | 2,6  | 0                               | 0,0  | 2                                | 8,0  |        |
| 10. Research in Women's Health                                              | 1                              | 1,3  | 1                               | 1,9  | 0                                | 0,0  |        |
| <b>XIV. Legislation and Ethics</b>                                          |                                |      |                                 |      |                                  |      |        |
| 1. Rights of women and the newborn                                          | 3                              | 3,9  | 3                               | 5,8  | 0                                | 0,0  |        |
| 2. Labor rights and maternity                                               | 3                              | 3,9  | 3                               | 5,8  | 0                                | 0,0  |        |
| 3. Ethical aspects in women's health care                                   | 3                              | 3,9  | 3                               | 5,8  | 0                                | 0,0  |        |
| 4. Legal responsibilities                                                   | 3                              | 3,9  | 3                               | 5,8  | 0                                | 0,0  |        |
| 5. Control and protection of professional practice                          | 3                              | 3,9  | 3                               | 5,8  | 0                                | 0,0  |        |

|                                                                          | Total Universities<br>(N = 77) |     | Public Universities<br>(n = 52) |      | Private Universities<br>(n = 25) |      | p |
|--------------------------------------------------------------------------|--------------------------------|-----|---------------------------------|------|----------------------------------|------|---|
|                                                                          | n                              | %   | n                               | %    | n                                | %    |   |
| 6 Legislation and ethics at birth                                        | 4                              | 5,2 | 10                              | 19,2 | 4                                | 16,0 |   |
| 7. Legislation and ethics in assisted reproduction                       | 2                              | 2,6 | 14                              | 26,9 | 6                                | 24,0 |   |
| 8. Legislation and ethics in contraception and interruption of pregnancy | 4                              | 5,2 | 10                              | 19,2 | 4                                | 16,0 |   |
| 9. Crimes against sexual freedom                                         | 5                              | 6,5 | 4                               | 7,7  | 1                                | 4,0  |   |
| 10. Adoption and foster care of a child                                  | 3                              | 3,9 | 3                               | 5,8  | 0                                | 0,0  |   |
| 11. Surrogacy                                                            | 1                              | 1,3 | 1                               | 1,9  | 0                                | 0,0  |   |
| <b>XV. Women's Health Services Administration</b>                        |                                |     |                                 |      |                                  |      |   |
| 1. Health systems models                                                 | 2                              | 2,6 | 2                               | 3,8  | 0                                | 0,0  |   |
| 2. Analysis of the situation                                             | 2                              | 2,6 | 2                               | 3,8  | 0                                | 0,0  |   |
| 3. The Maternal-Infant Hospital                                          | 2                              | 2,6 | 2                               | 3,8  | 0                                | 0,0  |   |
| 4. Primary-Community Care                                                | 3                              | 3,9 | 2                               | 3,8  | 1                                | 4,0  |   |
| 5. Development of objectives in Women's Health                           | 2                              | 2,6 | 2                               | 3,8  | 0                                | 0,0  |   |
| 6. Registration systems in Women's Health                                | 2                              | 2,6 | 2                               | 3,8  | 0                                | 0,0  |   |
| 7. Coordination between the different levels of healthcare               | 2                              | 2,6 | 2                               | 3,8  | 0                                | 0,0  |   |
| 8. Development of healthcare protocols                                   | 2                              | 2,6 | 2                               | 3,8  | 0                                | 0,0  |   |
| 9. Process and program evaluation                                        | 3                              | 3,9 | 2                               | 3,8  | 1                                | 4,0  |   |

**Bold:** Percentage ≥ 75%
